1 **Antigen B from *Echinococcus granulosus* enters mammalian cells by**  
2 **endocytic pathways**

3

4 **Short title: Antigen B uptake by mammalian cells**

5

6 Edileuza Danieli da Silva<sup>1,2</sup>, Martin Cancela<sup>1,2</sup>, Karina Mariante Monteiro<sup>1,3</sup>, Henrique  
7 Bunselmeyer Ferreira<sup>1,3</sup>, Arnaldo Zaha<sup>1,2,\*</sup>

8 <sup>1</sup>Programa de Pós-Graduação em Biologia Celular e Molecular, Centro de Biotecnologia,  
9 Universidade Federal do Rio Grande do Sul, Porto Alegre, Brazil.

10 <sup>2</sup>Laboratório de Biologia Molecular de Cestódeos, Centro de Biotecnologia, Universidade  
11 Federal do Rio Grande do Sul, Porto Alegre, Brazil.

12 <sup>3</sup>Laboratório de Genômica Estrutural e Funcional, Centro de Biotecnologia, Universidade  
13 Federal do Rio Grande do Sul, Porto Alegre, Brazil.

14

15 \*Corresponding author

16 E-mail: [zaha@cbiot.ufrgs.br](mailto:zaha@cbiot.ufrgs.br) (AZ)

17

18

## 19 **Abstract**

20 Cystic hydatid disease is a zoonosis caused by the larval stage (hydatid cyst) of  
21 *Echinococcus granulosus* (Cestoda, Taeniidae). The hydatid cyst develops in the viscera  
22 of intermediate host as a unilocular structure filled by the hydatid fluid, which contains  
23 parasitic excretory/secretory products. Antigen B (AgB) is the major component of *E.*  
24 *granulosus* metacestode hydatid fluid. Functionally, AgB has been implicated in  
25 immunomodulation and lipid transport. However, the mechanisms underlying AgB  
26 functions are not completely known. In this study, we investigated AgB interactions with  
27 different mammalian cell types and the pathways involved in its internalization. AgB uptake  
28 was observed in four different cell lines, NIH-3T3, A549, J774 and RH. Inhibition of raft-  
29 mediated endocytosis causes about 50 and 69% decrease in AgB internalization by RH  
30 and A549 cells, respectively. Interestingly, AgB colocalized with the raft endocytic marker,  
31 but also showed a partial colocalization with the clathrin endocytic marker. The results  
32 indicate that raft-mediated endocytosis is the main route to AgB internalization, and that a  
33 clathrin-mediated entry may also occur at a lower frequency. Cellular internalization could  
34 be a requirement for AgB functions as a lipid carrier and/or immunomodulatory molecule,  
35 contributing to create a more permissive microenvironment to metacestode development  
36 and survival.

37

## 38 **Author summary**

39 Antigen B (AgB) is an oligomeric lipoprotein highly abundant in *Echinococcus granulosus*  
40 hydatid fluid. AgB has already been characterized as an immunomodulatory protein,  
41 capable of inducing a permissive immune response to parasite development. Also, an  
42 important role in lipid acquisition is attributed to AgB, because it has been found  
43 associated to different classes of host lipids. However, the mechanisms of interaction  
44 employed by AgB to perform its functions remain undetermined. In this study, we

45 demonstrate that mammalian cells are able to internalize *E. granulosus* AgB in culture and  
46 found that specific mechanisms of endocytosis are involved. Our results extend the  
47 understanding of AgB biological role indicating cellular internalization as a mechanism of  
48 interaction, which in turn, may represent a target to intervention.

49

## 50 **Introduction**

51 Cystic hydatid disease (CHD), caused by the larval stage (hydatid cyst or  
52 metacestode) of parasites belonging to the *Echinococcus granulosus sensu lato* (s.l.)  
53 complex, is a zoonosis of worldwide occurrence, with a considerable medical and  
54 economic impact [1]. CHD is endemic or hyperendemic in South America, especially in  
55 Argentina, Southern Brazil, Uruguay, Chile and mountainous regions of Peru and Bolivia  
56 [2]. In 2010, the World Health Organization added CHD to its list of Neglected Tropical  
57 Diseases ([http://www.who.int/neglected\\_diseases/diseases/en/](http://www.who.int/neglected_diseases/diseases/en/)). *Echinococcus granulosus*  
58 *sensu stricto*, or simply *Echinococcus granulosus*, is one of the cryptic species of the *E.*  
59 *granulosus* s.l. complex and is the species most widely distributed worldwide. Also, *E.*  
60 *granulosus* is responsible for most cases of human CHD infections [3].

61 The adult tapeworm lives in the small intestine of a definitive canid host, and the  
62 larval stage develops in the viscera of a wide range of mammal species, including  
63 humans. *E. granulosus* life cycle is predominantly domestic, where dogs are the definitive  
64 hosts and ungulates are the intermediate hosts [4]. The metacestode is a fluid-filled,  
65 unilocular cyst containing protoescoleces in its lumen. Protoescoleces are the pre-adults,  
66 infective to the definitive host, which remain quiescent and immersed in the hydatid fluid  
67 (HF), which is a complex mixture of molecules of both host and parasite origin. The  
68 excretory/secretory products of the metacestode are of special relevance for the host-  
69 parasite relationship, as they have a greater potential to interact with host proteins and  
70 cells.

71           Antigen B (AgB) is the most abundant and the major immunodominant protein  
72 among the excretory/secretory metacestode products in the HF. AgB belongs to the group  
73 of hydrophobic ligand binding proteins (HLBPs), a cestode protein family whose members  
74 are known by their high abundance and immunogenicity, and by their oligomeric structure,  
75 comprising 7-10 kDa  $\alpha$ -helix rich subunits [5,6]. The AgB oligomeric structure comprises 8  
76 kDa subunits (AgB8/1 to AgB8/5) encoded by a multigene family [7], which are  
77 differentially expressed among the parasite life-cycle stages, metacestode tissues and  
78 individuals [8–10]. AgB oligomers have been observed predominantly in the molecular  
79 mass range of 150-200 kDa, but aggregates with higher molecular masses have also been  
80 detected [9,11].

81           It has been demonstrated that delipidated AgB is able to bind hydrophobic  
82 compounds *in vitro* [12]. The lipid moiety associated with AgB was analyzed and different  
83 lipids were identified, with cholesterol, phospholipids and triacylglycerides being the most  
84 prominent [13]. Moreover, delipidated recombinant AgB8/2 and AgB8/3 subunits were  
85 capable of transferring fatty acids analogues to artificial phospholipid membranes [14]. *E.*  
86 *granulosus* genome lacks sequences for several key enzymes for fatty acid and  
87 cholesterol synthesis, thus the parasite is incapable of synthesizing these compounds *de*  
88 *novo* [15,16]. Hydatid cyst viability relies on the sequestration and utilization of host lipids,  
89 and AgB might be involved in lipid uptake from host tissue and its transport to the parasite,  
90 by stabilizing insoluble lipids into a lipoproteic particle [13].

91           In addition, AgB roles in the modulation of both innate and adaptive immunity have  
92 been proposed. It has been described that neutrophils have both the recruitment inhibited  
93 and hydrogen peroxide production decreased by AgB [17,18]. Besides, AgB polarizes the  
94 immunological response to a Th2 profile, which is protective to the parasite [19,20].

95           Considering the two main roles attributed to AgB, immunomodulation and lipid  
96 transport, it is reasonable to consider that a direct interaction with host cells and tissues

97 should occur. In fact, it was recently demonstrated that AgB binds to macrophages and the  
98 plasma membrane of inflammatory monocytes, inducing a non-inflammatory phenotype in  
99 macrophages [21]. However, little is known about the molecular details of AgB-cell  
100 interaction and whether AgB interacts with non-immune cells, or even enters into the cell.

101 In the present work, we investigated the ability of HF-purified AgB oligomers to  
102 enter into different mammalian cell types *in vitro*, and the mechanisms involved in AgB  
103 internalization. Immunopurified AgB was incubated with four distinct cell lines  
104 representative of different cell types, namely hepatocytes, fibroblasts, macrophages, and  
105 lung epithelial cells. We demonstrated the entry of AgB into the cytoplasm of all studied  
106 cell lines. Moreover, we provided evidence that the endocytic pathways are involved in  
107 AgB internalization by cells, with raft-mediated endocytosis being the prevailing one.

108

## 109 **Methods**

### 110 **Biological material**

111 Bovine viscera containing hydatid cysts from *E. granulosus* were obtained from a  
112 local slaughterhouse (São Leopoldo, Brazil). Animal slaughtering was conducted  
113 according to Brazilian laws and under supervision of the *Serviço de Inspeção Federal*  
114 (Brazilian Sanitary Authority) of the Brazilian *Ministério da Agricultura, Pecuária e*  
115 *Abastecimento*. HF was removed by puncture and aspiration from individual fertile cysts  
116 and kept at -80°C until use. Parasite genotyping was performed for species determination  
117 [22].

### 118 **Immunoblot**

119 Aliquots of 100 µl of HF samples were resolved on SDS-PAGE 12% and  
120 electrophoretically transferred onto a nitrocellulose membrane. A pool of rabbit polyclonal  
121 antibodies raised against each recombinant AgB subunit (AgB8/1 to 5) were used at  
122 1:70.000 dilution as primary antibody. A horseradish peroxidase-conjugated goat anti-

123 rabbit IgG (GE Healthcare) diluted at 1:7.000 was used as the secondary antibody. Blots  
124 were developed using the chemiluminescent reagent ECL Plus (Pierce, ThermoScientific)  
125 and imaged in VersaDoc system (BioRad). HF samples with higher AgB content were  
126 used for the protein purification step (S1A Fig).

### 127 ***E. granulosus* AgB purification**

128 AgB purification was carried out following the protocol described by Oriol *et al.* [23],  
129 with some modifications. Briefly, parasite proteins from *E. granulosus* HF were precipitated  
130 by sodium acetate (5 mM, pH 5.0) and the resultant material was resuspended in  
131 phosphate-buffered saline (PBS) containing 20  $\mu$ M 3,5-di-tert-butyl-4-hydroxytoluene  
132 (BHT). The HF parasite enriched fraction was subjected to immunoaffinity chromatography  
133 using rabbit polyclonal antibodies against the recombinant forms of AgB8/1, AgB8/2 and  
134 AgB8/4. Antibodies were separately coupled to cyanogen bromide-activated Sepharose™  
135 4B resin (GE Healthcare) and the previously prepared HF material was passed through  
136 the columns. Bound AgB from each column was eluted with 100 mM tris-glycine pH 2.5,  
137 then pooled together, dialyzed against PBS/BHT and concentrated on Amicon Ultra-15  
138 centrifugal filter device, MWCO 3 kDa (Millipore). Purified AgB was analyzed on SDS-  
139 PAGE 12% (S1B Fig). AgB concentration was determined using a Qubit quantitation  
140 fluorometer and Quant-iT reagents (Life Technologies).

### 141 **Cell cultures**

142 NIH-3T3 (mouse fibroblasts), A549 (human lung adenocarcinoma), J774 (mouse  
143 macrophages) and RH (rat hepatoma) cells were cultivated in DMEM containing 10% fetal  
144 bovine serum, 100 U/ml penicillin and 100  $\mu$ g/ml streptomycin in a 5% CO<sub>2</sub> humidified  
145 environment at 37°C. J774 culture media was also supplemented with MEM non-essential  
146 amino acid solution, 2 mM glutamine, 10 mM HEPES and 1 mM sodium pyruvate. All cells  
147 lines were free from mycoplasma contamination.

148

149 **AgB internalization assays**

150 NIH-3T3, A549, J774 and RH cells were grown on sterile glass coverslips in 35 mm  
151 Petri dishes. Cell media was changed to serum-free medium and the cells were then  
152 incubated with 40 µg/ml of AgB oligomers for 4 h at 37°C, or 4°C. Controls were incubated  
153 with equal volume of PBS/BHT. Unbound protein was then removed by three washes with  
154 cold PBS and cells were fixed in 4% paraformaldehyde/PBS at room temperature for 15  
155 min.

156 In all microscopy preparations, a pool with the same proportion of polyclonal  
157 antibodies against AgB8/1, AgB8/2 and AgB8/4 subunits was used as primary antibody for  
158 detection of AgB oligomers. Fixed cells were permeabilized with 0.2% Triton X-100/PBS  
159 and unspecific sites were blocked with 5% BSA in PBS-T (PBS with 0.05% Tween-20).  
160 After, cells were incubated overnight at 4°C with the primary antibodies (1:500) and then  
161 for 1 h with 1:200 diluted Alexa Fluor® 488-conjugated anti-rabbit secondary antibody  
162 (Molecular Probes) at room temperature. Nuclei were stained with 100 nM 4',6-diamidino-  
163 2-phenylindole (DAPI) (Molecular Probes). Actin was stained with 50 nM Alexa Fluor® 594-  
164 conjugated phalloidin (Molecular Probes). Cells were imaged using a LSM 710 Zeiss  
165 confocal microscope.

166 The fluorophore CM-Dil (Molecular Probes) was used to directly label AgB  
167 oligomers, because it has affinity to the lipidic compounds associated to the protein. Dil-  
168 labelled AgB was used to analyze internalization without cells fixation. AgB was labelled  
169 with 5 µM CM-Dil (Molecular Probes) for 1 h at room temperature. Dye excess was  
170 washing out with 5-fold the original PBS volume on Amicon Ultra-0.5 centrifugal filter  
171 devices, NMWL 100 kDa (Millipore). RH cells were incubated with 40 µg/ml of Dil-labelled  
172 AgB oligomers for 4 h at 37°C, washed three times with cold PBS, and immediately  
173 analyzed using an Olympus FluoView 1000 confocal microscope.

174

175 **Endocytosis inhibition assays**

176 RH and A549 cell monolayers were grown on sterile glass coverslips in six-well  
177 tissue culture plates. After changing the cell media to serum-free DMEM, cells were pre-  
178 treated with endocytosis inhibitors for 30 min at 37°C. A pilot test, where cells were  
179 incubated with different concentrations of the inhibitors, was conducted to determine the  
180 best concentration to be used. The highest concentration where >80% of the cells  
181 remained attached and with little morphological alterations was chosen.

182 Genistein (Santa Cruz Biotechnology) was used at 100 µg/ml concentration and  
183 chlorpormazine (Santa Cruz Biotechnology) at 5 µg/ml. AgB was then added at 40 µg/ml  
184 and after incubation at 37°C for 1.5 h, the unbound proteins were removed by acidic  
185 stripping (0.5 M NaCl, 0.5% acetic acid, pH 3.0) and three washes with cold PBS. Cells  
186 were fixed and prepared for microscopy as described above. Cells were imaged using an  
187 Olympus FluoView 1000 confocal microscope. Immunofluorescence intensity normalized  
188 by cell area was assessed with ImageJ software [24]. Image analysis was done on two  
189 (A549) or three (RH) independent experiments, where three microscopy fields were  
190 counted for each experiment (100–300 cells/experiment).

191 **Colocalization assays**

192 RH cell monolayers were grown on sterile glass coverslips in 6-well tissue culture  
193 plates. Cell media was replaced to serum-free DMEM containing 40 µg/ml AgB and the  
194 distribution of internalized protein was compared with that of different endocytic markers  
195 following up to 1.5 h incubation at 37°C. Endogenous transferrin receptors were labeled  
196 with 50 µg/ml Alexa Fluor® 633-conjugated transferrin (Tfn) (Molecular Probes), added in  
197 the last 45 min. Alexa Fluor® 555-conjugated cholera toxin subunit B (Ctx-B) (Molecular  
198 Probes) at 1 µg/ml concentration was added in the last 15 min of incubation. Adsorbed and  
199 unbound proteins were removed by acidic stripping (0.5 M NaCl, 0.5% acetic acid, pH 3.0)  
200 and three washes with cold PBS. Cells were prepared for microscopy and imaged as



201 described for endocytosis assay. Colocalization was assessed using JaCoP plugin from  
202 ImageJ software [25]. Image analysis was done for two independent experiments.

### 203 **MTT reduction assays**

204 A549 and RH cells were plated onto 96-well plates at a density of  $10^4$  cells/well.  
205 AgB oligomers were added to the cell media at 2.5 – 40  $\mu\text{g/ml}$  final concentrations. After  
206 24 h incubation, 0.5 mg/ml of MTT solution in PBS was added to each well and incubated  
207 for a further 4 h. To solubilize formazan, 100  $\mu\text{l}$  of cell lysis buffer (16% SDS, 40% N,N-  
208 dimethylformamide, 2% acetic acid, pH 4.7) was added to each well and the samples were  
209 incubated overnight at 37°C in a humidified incubator. Absorbance values of formazan  
210 were determined at 595 nm with an automatic microplate reader (Bio-Rad, model 550).  
211 Analysis was done for five independent experiments.

### 212 **Statistics**

213 A Kolmogorov-Smirnov was applied to verify the normality of the data. Statistical  
214 significance was analyzed by unpaired Student's t-test using the GraphPad Prism 6.0  
215 software. Data are expressed as mean  $\pm$  SEM and p values of less than 0.05 were  
216 considered statistically significant.

217

## 218 **Results**

### 219 **AgB oligomers are internalized by mammalian cells in culture**

220 To investigate the ability of AgB oligomers to interact with and to be internalized by  
221 mammalian cells, AgB from *E. granulosus* HF was immunopurified and added to the  
222 culture medium of NIH-3T3, A549, RH or J774 cells. AgB internalization was evaluated  
223 after 4 h of incubation at 37°C using an immunofluorescence assay. Cells were prepared  
224 for confocal microscopy by labelling AgB oligomers with polyclonal antibodies against  
225 AgB8/1, 2 and 4 subunits and a secondary anti-rabbit IgG conjugated to Alexa Fluor® 488.  
226 AgB signals were detected in the four cell lines tested, suggesting that AgB is able to

227 interact with mammalian cells by a mechanism independent of cellular type. No signals  
228 were detected in the cells without AgB (Fig 1).

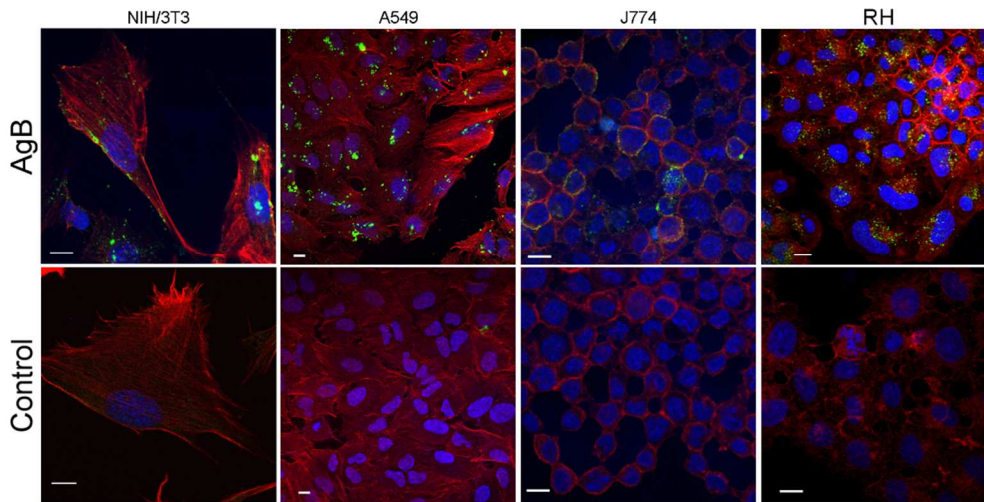

229

230 **Fig. 1. *E. granulosus* AgB uptake by mammalian cells in culture.** Immunofluorescence

231 assay was performed on NIH-3T3, A549, J774 and RH cells exposed to 40  $\mu\text{g/ml}$  AgB for

232 4 h, and mock treated cells (Control). AgB was labeled with antibodies against AgB8/1, 2

233 and 4 subunits and an Alexa Fluor<sup>®</sup> 488-conjugated secondary antibody (green). Nuclei

234 and cytoskeleton were stained with DAPI (blue) and Alexa Fluor<sup>®</sup> 594-conjugated

235 phalloidin (red), respectively. Images are median optical sections from z-stacks obtained

236 by confocal microscopy. Scale bar, 10  $\mu\text{m}$ .

237

238 To confirm the internal localization of AgB in the cells, the oligomers were labelled

239 with Dil and incubated with RH cells in the same way as before. However, the analysis on

240 confocal microscope was conducted right after incubation had been finished, without cell

241 fixation. The intermediate sections from confocal z-stacks showed higher AgB signal than

242 top or bottom sections, confirming that AgB was inside cells and not just adsorbed to cell

243 membrane (S2 Fig).

244 AgB was detected in the cell cytoplasm, but not in the nucleus. In addition, Fig 1

245 and S2 Fig show vesicular-like distribution of AgB oligomers in the cytoplasm of the cell

246 lines analyzed, indicating an internalization through endocytosis. Supporting this idea, AgB  
247 internalization does not occur when RH cells were incubated at low temperature (S3 Fig),  
248 a condition known to interfere in endocytosis-dependent cellular internalization [26].

### 249 **Endocytic pathways involved in AgB internalization**

250 Having established that AgB oligomers could access the cytoplasmic compartment  
251 of mammalian cells, we then investigated which endocytic pathway could be responsible  
252 for this AgB uptake by RH and A549 cells. These two cell lines were chosen to perform the  
253 following experiments in an attempt to simulate the natural situation, as liver and lungs are  
254 the primary organs infected by *E. granulosus*.

255 Genistein, a tyrosine kinase inhibitor that prevents lipid raft-mediated endocytosis,  
256 was used to treat RH cells; and after 30 min AgB oligomers were added to the culture  
257 media and left to incubate for another 1.5 h at 37°C. We found that internalization of AgB  
258 was inhibited by ~50% in RH cells treated with genistein (Figs 2A and 2B). The same  
259 inhibition assay was carried out with A549 cells and we found very similar results, where  
260 AgB uptake was inhibited by ~69% (Figs 2A and 2B). The results were statistically  
261 significant for both cell lines (Fig 2B).

262

263

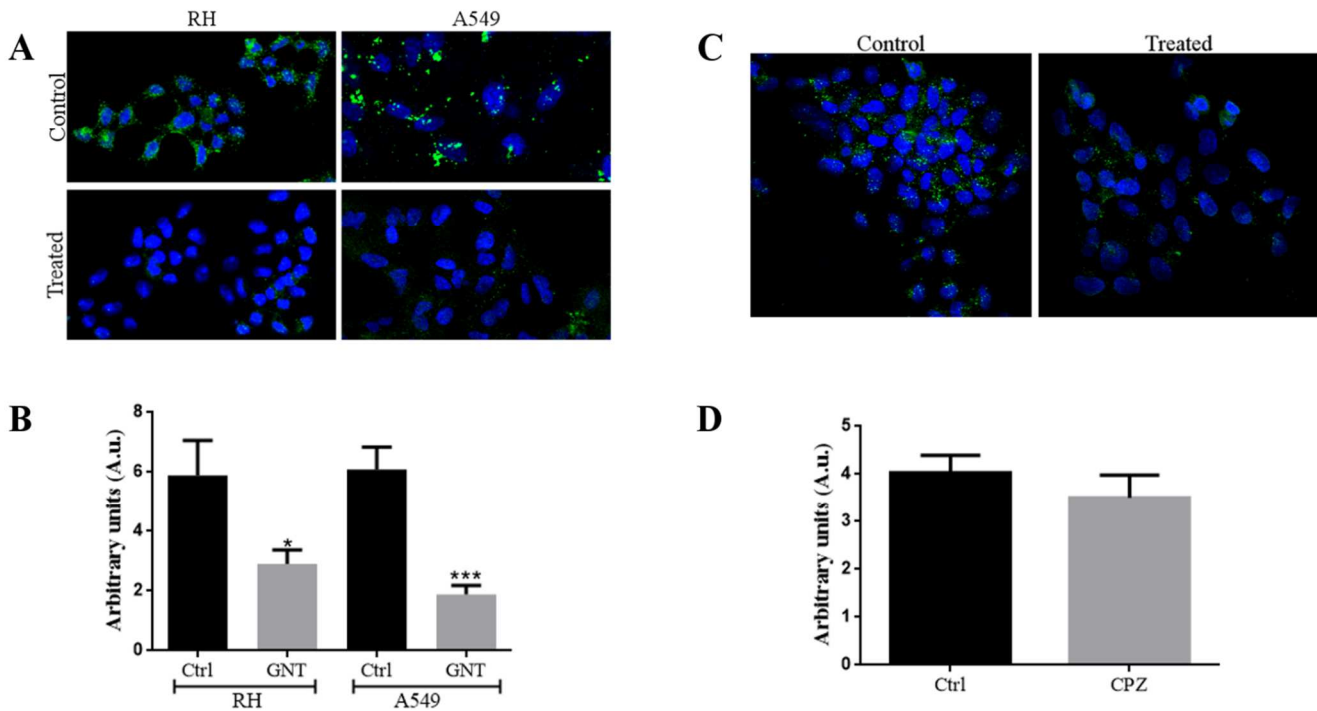

264 **Fig. 2. Raft-mediated endocytosis is the main route involved in *E. granulosus* AgB**  
 265 **internalization by A549 and RH cells.** *A*, inhibition of raft-mediated endocytosis by  
 266 genistein reduces AgB internalization. *Lower panels*, RH and A549 cells pre-treated with  
 267 100 µg/ml genistein, then exposed to 40 µg/ml AgB for 1.5 h. *Upper panels*, non-treated  
 268 cells. *B*, quantitative data for AgB internalization after genistein (GNT) treatment  
 269 represented in *A*. *C*, inhibition of clathrin-mediated endocytosis pathway by  
 270 chlorpromazine does not cause a significant decrease in uptake of AgB by RH cells. *Right*  
 271 *panel*, cells treated with 5 µg/ml chlorpromazine for 30 min, then exposed to 40 µg/ml AgB  
 272 for 1.5 h. *Left panel*, non-treated cells. *D*, quantitative data for AgB internalization after  
 273 chlorpromazine (CPZ) treatments represented in *B*. AgB was detected using antibodies  
 274 against AgB8/1, 2 and 4 subunits and a secondary anti-rabbit IgG Alexa Fluor® 488  
 275 conjugated antibody (green). Cell nuclei were labeled with DAPI (blue). Ctrl: control.  
 276 Measurements from three experiments with RH cells and two with A549 cells were  
 277 averaged. Error bars indicate SEM. \* $p=0.037$ , \*\*\* $p=0.0004$  according to Student's t-test.

278 In order to test whether other endocytic pathways could be involved in AgB  
279 oligomers uptake by RH cells, the inhibition assay was performed using chlorpromazine,  
280 an inhibitor of clathrin-mediated endocytosis. After chlorpromazine treatment,  
281 internalization of AgB was reduced by ~13%, however this was not statistically significant  
282 ( $p = 0.39$ ) (Figs 2C and 2D). The higher inhibition of AgB internalization in the genistein  
283 treatment indicates that raft-mediated endocytosis is the major pathway associated with  
284 AgB uptake.

285 The specificity of the inhibitors was confirmed using established endocytic markers  
286 as controls. Internalization of transferrin (Tfn), which undergoes clathrin-mediated  
287 endocytosis, was affected only by chlorpromazine. In contrast, genistein only reduced  
288 internalization of cholera toxin subunit B (Ctx-B), which undergoes raft-mediated  
289 endocytosis (S4 Fig).

290 In a complementary approach, the distribution of internalized AgB was compared  
291 with that of established endocytic markers, Tfn and Ctx-B. RH cells were cultivated in the  
292 presence of AgB for 1.5 h, with either Tfn or Ctx-B being added in the last 45 and 15 min  
293 of incubation, respectively. Results were analyzed by confocal microscopy and the level of  
294 colocalization between the two fluorophores and, consequently, the two proteins, was  
295 determined according to Pearson's correlation coefficient. The results indicated that AgB  
296 was colocalized with Ctx-B (Pearson's coefficient =  $0.64 \pm 0.02$ ) (Fig 3), which is in  
297 accordance with our previous results that raft-mediated endocytosis is involved in AgB  
298 uptake. Interestingly, AgB seemed partially colocalized with Tfn (Pearson's coefficient =  
299  $0.49 \pm 0.04$ ), suggesting that in some degree AgB could be internalized by clathrin-  
300 mediated endocytosis.

301

302

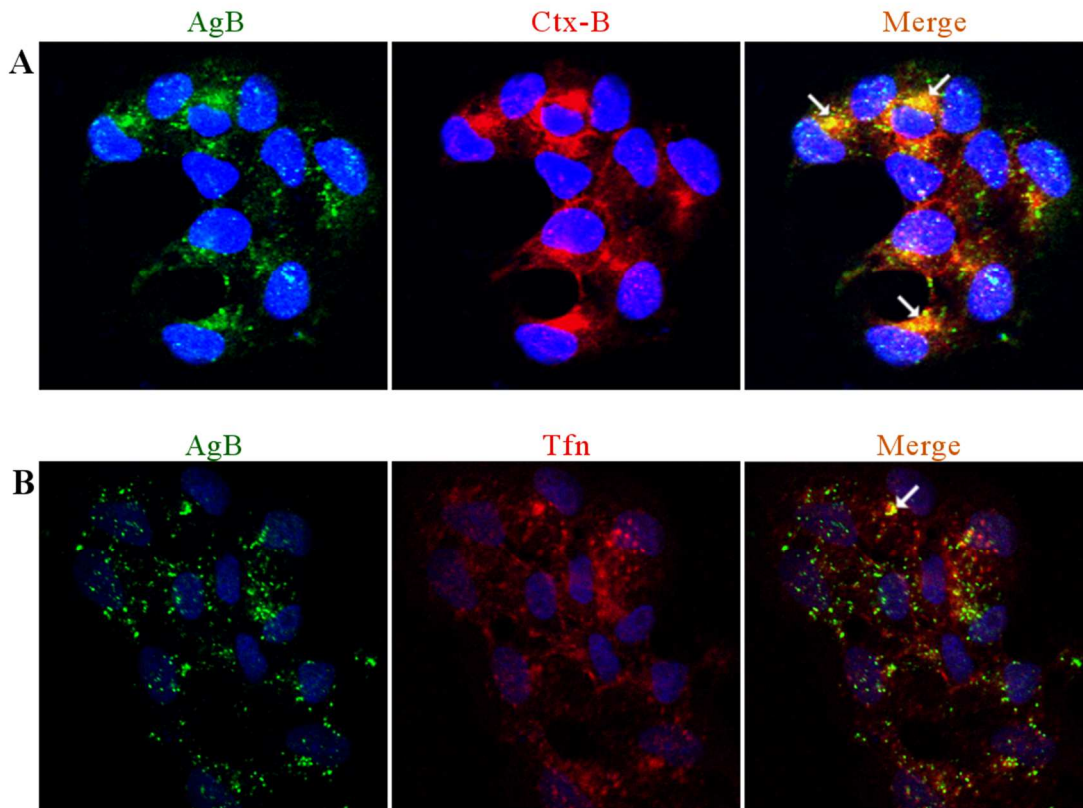

303 **Fig. 3. Internalized *E. granulosus* AgB colocalizes with protein endocytic markers in**  
304 **RH cells.** Alexa Fluor® 633-conjugated Tfn was used as a marker of clathrin-mediated  
305 endocytosis and Alexa Fluor® 555-conjugated Ctx-B was used as a marker of raft-  
306 mediated endocytosis. Confocal microscopy images of RH cells incubated with 40 µg/ml  
307 AgB and 1 µg/ml Ctx-B (A) or 50 µg/ml Tfn (B) are presented. AgB was detected using  
308 antibodies against AgB8/1, 2 and 4 subunits and a secondary anti-rabbit IgG Alexa Fluor®  
309 488 conjugated antibody (green). Arrows indicate colocalization points. Cell nuclei were  
310 labeled with DAPI (blue). The endocytic markers are shown in red.

311

312 Altogether, the above findings provide evidence that AgB entry into mammalian  
313 cells occurs mainly via raft-mediated endocytosis, although it could also occur by clathrin-  
314 mediated endocytosis in a lesser extent.

315

316



317 **AgB oligomers do not induce cellular toxicity**

318 To further investigate the possible effects of AgB oligomers internalization by  
319 mammalian cells, A549 and RH cells were incubated with different concentrations of AgB  
320 (2.5-40 µg/ml) for 24 h. Alterations of cell physiologic state were then evaluated by MTT  
321 reduction assays. Both cell lines did not present any significant decrease in their ability to  
322 metabolize MTT in presence of AgB oligomers (Fig 4). AgB oligomers do not have a  
323 cytotoxic effect on cells, so this interaction is probably part of the mechanisms underlying  
324 AgB function in host-parasite interplay.

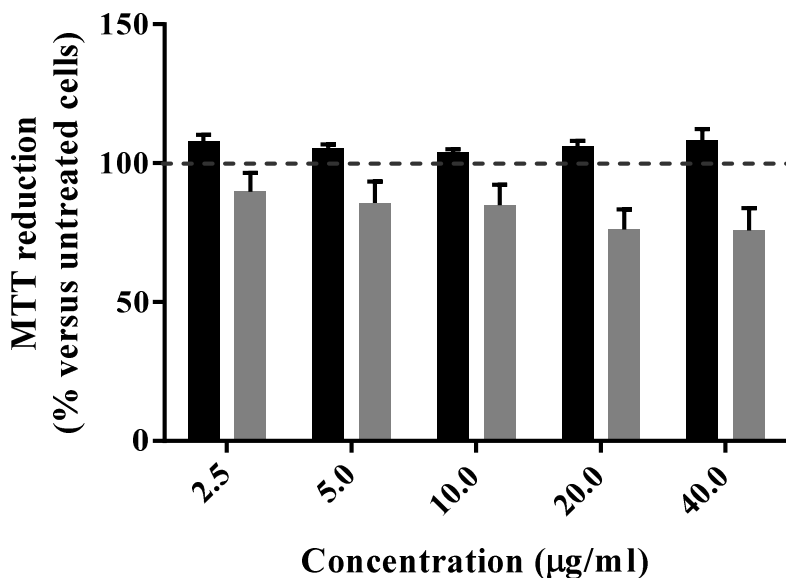

325  
326 **Fig. 4. MTT reduction assay.** A549 (black bars) and RH (gray bars) cells were treated for  
327 24 h with the indicated concentrations of *E. granulosus* AgB oligomers. Cell viability is  
328 expressed as percentage of MTT reduction measured for untreated cells and assumed as  
329 100% (horizontal dashed line). Error bars correspond to the SEM values of five  
330 independent experiments.

331  
332 **Discussion**

333 A long-term growth is characteristic of the chronic infection caused by *E. granulosus*  
334 metacestodes, and to allow that, different molecular mechanisms are employed by the

335 parasite to ensure its survival and development in the host microenvironment. In an  
336 attempt to evade the host's immune response and absorb nutrients from the host, the  
337 parasite secretes several molecules. AgB is the major antigen in HF and has been  
338 implicated in immunomodulation processes, as well as in lipid transport and uptake  
339 [13,27].

340 AgB has been studied for a long time and it is known to generate a strong humoral  
341 response and to modulate host immune response, which is in agreement with the idea that  
342 AgB is secreted towards the outside of the hydatid cyst [27,28]. Moreover, there are many  
343 studies reporting AgB effects on immune cells that support a direct AgB-cell interaction in  
344 host tissue [20,21]. However, whether this interaction occurs with other cell types and what  
345 underlying mechanisms are involved in this process, are still unclear. We hypothesized  
346 that AgB may interact with host tissue cells surrounding the hydatid cyst to interfere with  
347 host cell homeostasis, facilitating nutrient acquisition and immune evasion. In this study,  
348 we demonstrated that *E. granulosus* AgB is taken up by mammalian cells *in vitro* by  
349 endocytosis. Since AgB internalization seems to be independent of the cell type, it most  
350 likely occurs by a ubiquitous mechanism. Thus, we further evaluate the involvement of  
351 specific endocytic pathways on AgB internalization.

352 Clathrin-mediated endocytosis is the best-understood internalization pathway and  
353 refers to intake of receptors and their bound ligands through vesicles which are coated by  
354 the protein clathrin [29]. Among the molecules known to be internalized by this pathway is  
355 the Tfn receptor, hence Tfn was used as a marker for clathrin-mediated endocytosis [30].  
356 Besides the clathrin-mediated pathway, lipid rafts domains are important contributors to  
357 endocytosis processes. These are heterogeneous membrane domains enriched in  
358 sphingolipids and cholesterol, and are involved in the endocytosis of various receptors and  
359 ligands with a multitude of mechanisms and regulation factors [31]. Ctx-B is a molecule  
360 that binds to glycosphingolipid GM1 on rafts to be subsequently internalized, so we used it



361 as a marker for raft-mediated endocytosis [32]. Chlorpromazine and genistein were used  
362 in this study to inhibit clathrin- and raft-mediated endocytosis pathways, respectively.

363 Treatment with genistein was able to significantly decrease AgB oligomers uptake  
364 by RH and A549 cells. Accordingly, we found that AgB colocalizes with Ctx-B in RH cells.  
365 We observed a partial colocalization of AgB with Tfn and the inhibition assay with  
366 chlorpromazine showed only a slight, not significant, decrease in AgB internalization. It is  
367 possible that clathrin-mediated endocytosis accounts for just a small part of AgB uptake,  
368 making difficult the detection of a difference after inhibition by chlorpromazine. Taken  
369 together, our results are consistent with the idea that the endocytosis process is required  
370 for AgB entry into mammalian cells. Indeed, raft-mediated endocytosis is most likely the  
371 main pathway involved in AgB uptake by cells. However, a minor role for clathrin-mediated  
372 endocytosis in AgB internalization cannot be excluded.

373 It was proposed that AgB binds to macrophages and monocytes plasma  
374 membranes through a lipoprotein receptor; however no specific receptor could be  
375 determined [21]. Our findings are in agreement with this idea because some lipoprotein  
376 receptors, such as lectin-like oxidized LDL receptor-1 (LOX-1), LDL receptor-related  
377 protein 6 (LRP6), and scavenger receptors CD36 and CD204 use raft-mediated pathways  
378 for endocytosis [33–36]. Considering our results, it is also possible that more than one  
379 receptor might be involved in AgB binding, so that a higher efficiency of internalization is  
380 obtained. Alternatively, the receptor undergoes endocytosis by both pathways upon AgB  
381 binding. This regulatory mechanism involving different endocytic routes has been  
382 observed with LRP6, in which the receptor is internalized by caveolae (a raft subdomain)  
383 to promote Wnt/ $\beta$ -catenin signaling transduction, whereas the clathrin route leads to LRP6  
384 degradation [37]. AgB uptake did not induce toxicity to cells according to our MTT assay,  
385 therefore internalization is more likely part of the mechanisms underlying AgB roles during  
386 *E. granulosus* metacestode infection. AgB-cell interaction may be a mechanism used by

387 the parasite to create a more permissive microenvironment for metacestode development  
388 and survival. AgB presence in cytoplasm could interfere with cell metabolism, generating  
389 molecules and/or signals beneficial to the parasite.

390 The lack of genes coding for several key enzymes involved in fatty acid and  
391 cholesterol synthesis [15,16] reinforce the idea that AgB interaction with cells from the host  
392 tissue surrounding the hydatid cyst is a suitable scenario to get lipids from biological  
393 membranes or inner cell storages. A similar scenario has been described for the *Taenia*  
394 *solium* metacestode, where HLBP's were able to translocate lipid analogs to parasites'  
395 tissues, and also colocalize with lipid droplets in the granuloma surrounding the  
396 metacestode [6]. Since lipids are essential for metacestode survival and development, the  
397 understanding of molecular mechanisms employed by the parasites to acquire these host  
398 macromolecules will provide potential targets for therapeutic discovery efforts.

399 AgB internalization by immune cells could influence the signalization towards anti-  
400 inflammatory or alternative pathways, eliciting a host non-protective response  
401 characteristic of immunoevasion processes. Similarly, in *Fasciola hepatica* a cathelicidin-  
402 like protein was described to bind lipid rafts, and after internalization, to divert  
403 macrophages function by suppressing lysosomal activity and, consequently, interfering  
404 with antigen presentation [38].

405 The destination of AgB after entry into cells was not evaluated here, but is an  
406 important issue to be addressed in further investigations in order to confirm that AgB  
407 internalization is necessary for its proposed biological roles. Among many possible  
408 destinations, an endocytosed protein can be routed to the late endosomes and lysosomes  
409 for degradation, to the trans-Golgi network or to recycling endosomes that bring the cargo  
410 back to the plasma membrane [39]. It would be interesting to know if AgB goes to the  
411 recycle pathway, which would permit its further exocytosis and return to parasitic tissues,  
412 or if it goes to lysosome for degradation. Further studies of colocalization with lysosomes

413 and recycling endosomes using organelle markers described in the literature, as LAMP-1  
414 and Rab-11 [40,41], should help to elucidate the fate of AgB after internalization.

415 Like AgB, cestode HLBP are involved in parasite lipid homeostasis and  
416 immunological process [6,42]. Thus, further investigations on the cellular and molecular  
417 effect of HLBP on host cells are important steps to improve the understanding of the  
418 parasites biology and disease progression. Likewise, elucidating how the molecules  
419 sequestered by HLBP become available to parasites cells will help to identify potential  
420 targets for the treatment and control of cestodiasis.

421

## 422 **Acknowledgments**

423 We thank the *Centro de Microscopia e Microanálise* (CMM-UFRGS) for technical  
424 support with confocal microscopy.

425

## 426 **References**

- 427 1. Cardona GA, Carmena D. A review of the global prevalence, molecular  
428 epidemiology and economics of cystic echinococcosis in production animals. *Vet*  
429 *Parasitol.* 2013;192: 10–32. doi:10.1016/j.vetpar.2012.09.027
- 430 2. Cucher MA, Macchiaroli N, Baldi G, Camicia F, Prada L, Maldonado L, et al. Cystic  
431 echinococcosis in South America: systematic review of species and genotypes of  
432 *Echinococcus granulosus sensu lato* in humans and natural domestic hosts. *Trop*  
433 *Med Int Health.* 2016;21: 166–175. doi:10.1111/tmi.12647
- 434 3. Alvarez Rojas CA, Romig T, Lightowlers MW. *Echinococcus granulosus sensu lato*  
435 genotypes infecting humans - review of current knowledge. *Int J Parasitol.* 2014;44:  
436 9–18. doi:10.1016/j.ijpara.2013.08.008
- 437 4. McManus DP; Smyth JD. Hydatidosis: Changing Concepts in Epidemiology and  
438 Speciation. *Parasitol Today.* 1986;2.

- 439 5. Alvite G, Esteves A. Lipid binding proteins from parasitic platyhelminthes. Front  
440 Physiol. 2012;3: 363. doi:10.3389/fphys.2012.00363
- 441 6. Lee E-G, Kim S-H, Bae Y-A, Chung J-Y, Suh M, Na B-K, et al. A hydrophobic ligand-  
442 binding protein of the *Taenia solium* metacestode mediates uptake of the host lipid:  
443 implication for the maintenance of parasitic cellular homeostasis. Proteomics.  
444 2007;7: 4016–30. doi:10.1002/pmic.200700332
- 445 7. Chemale G, Haag KL, Ferreira HB, Zaha A. *Echinococcus granulosus* antigen B is  
446 encoded by a gene family. Mol Biochem Parasitol. 2001;116: 233–7.
- 447 8. Espínola SM, Ferreira HB, Zaha A. Validation of suitable reference genes for  
448 expression normalization in *Echinococcus* spp. larval stages. PLoS One. 2014;9:  
449 e102228. doi:10.1371/journal.pone.0102228
- 450 9. Monteiro KM, Cardoso MB, Follmer C, da Silveira NP, Vargas DM, Kitajima EW, et  
451 al. *Echinococcus granulosus* antigen B structure: subunit composition and  
452 oligomeric states. PLoS Negl Trop Dis. 2012;6: e1551.  
453 doi:10.1371/journal.pntd.0001551
- 454 10. Zhang W, Li J, Jones MK, Zhang Z, Zhao L, Blair D, et al. The *Echinococcus*  
455 *granulosus* antigen B gene family comprises at least 10 unique genes in five  
456 subclasses which are differentially expressed. PLoS Negl Trop Dis. 2010;4: e784.  
457 doi:10.1371/journal.pntd.0000784
- 458 11. Lightowlers M, Liu D, Haralambous A, Rickard M. Subunit composition and  
459 specificity of the major cyst fluid antigens of *Echinococcus granulosus*. Mol Biochem  
460 Parasitol. 1989;37: 171–82.
- 461 12. Chemale G, Ferreira HB, Barrett J, Brophy PM, Zaha A. *Echinococcus granulosus*  
462 antigen B hydrophobic ligand binding properties. Biochim Biophys Acta. 2005;1747:  
463 189–94. doi:10.1016/j.bbapap.2004.11.004
- 464 13. Obal G, Ramos AL, Silva V, Lima A, Batthyany C, Bessio MI, et al. Characterisation

- 465 of the native lipid moiety of *Echinococcus granulosus* antigen B. PLoS Negl Trop  
466 Dis. 2012;6: e1642. doi:10.1371/journal.pntd.0001642
- 467 14. Silva-Álvarez V, Franchini GR, Pórfido JL, Kennedy MW, Ferreira AM, Córscico B.  
468 Lipid-free antigen B subunits from *Echinococcus granulosus*: Oligomerization, ligand  
469 binding, and membrane interaction properties. PLoS Negl Trop Dis. 2015;9:  
470 e0003552. doi:10.1371/journal.pntd.0003552
- 471 15. Tsai IJ, Zarowiecki M, Holroyd N, Garcarrubio A, Sanchez-Flores A, Brooks KL, et  
472 al. The genomes of four tapeworm species reveal adaptations to parasitism. Nature.  
473 2013;496: 57–63. doi:10.1038/nature12031
- 474 16. Zheng H, Zhang W, Zhang L, Zhang Z, Li J, Lu G, et al. The genome of the hydatid  
475 tapeworm *Echinococcus granulosus*. Nat Genet. 2013;45: 1168–75.  
476 doi:10.1038/ng.2757
- 477 17. Shepherd JC, Aitken A, McManus DP. A protein secreted *in vivo* by *Echinococcus*  
478 *granulosus* inhibits elastase activity and neutrophil chemotaxis. Mol Biochem  
479 Parasitol. 1991;44: 81–90.
- 480 18. Virginio VG, Taroco L, Ramos AL, Ferreira AM, Zaha A, Ferreira HB, et al. Effects of  
481 protoscoleces and AgB from *Echinococcus granulosus* on human neutrophils:  
482 possible implications on the parasite's immune evasion mechanisms. Parasitol Res.  
483 2007;100: 935–42. doi:10.1007/s00436-006-0366-x
- 484 19. Riganò R, Profumo E, Buttari B, Teggi A, Siracusano A. Cytokine gene expression in  
485 peripheral blood mononuclear cells (PBMC) from patients with pharmacologically  
486 treated cystic echinococcosis. Clin Exp Immunol. 1999;118: 95–101.
- 487 20. Riganò R, Buttari B, Profumo E, Ortona E, Delunardo F, Margutti P, et al.  
488 *Echinococcus granulosus* antigen B impairs human dendritic cell differentiation and  
489 polarizes immature dendritic cell maturation towards a Th2 cell response. Infect  
490 Immun. 2007;75: 1667–78. doi:10.1128/IAI.01156-06

- 491 21. Silva-Álvarez V, Folle AM, Ramos AL, Kitano ES, Iwai LK, Corraliza I, et al.  
492 *Echinococcus granulosus* Antigen B binds to monocytes and macrophages  
493 modulating cell response to inflammation. *Parasit Vectors*. 2016;9: 69.  
494 doi:10.1186/s13071-016-1350-7
- 495 22. Balbinotti H, Santos GB, Badaraco J, Arend AC, Graichen DÂS, Haag KL, et al.  
496 *Echinococcus ortleppi* (G5) and *Echinococcus granulosus sensu stricto* (G1) loads in  
497 cattle from Southern Brazil. *Vet Parasitol*. 2012;188: 255–60.  
498 doi:10.1016/j.vetpar.2012.04.007
- 499 23. Oriol R, Williams J, Pérez Esandi M, Oriol C. Purification of lipoprotein antigens of  
500 *Echinococcus granulosus* from sheep hydatid fluid. *Am J Trop Med Hyg*. 1971;20:  
501 569–74.
- 502 24. Schneider AC, Rasband WS, Eliceiri KW. NIH Image to ImageJ: 25 years of image  
503 analysis. *Nat Methods*. 2012;9: 671–675. doi:10.1038/nmeth.2089
- 504 25. Bolte S, Cordelieres FP. A guided tour into subcellular colocalisation analysis in light  
505 microscopy. *J Microsc*. 2006;224: 13–232. doi:10.1111/j.1365-2818.2006.01706.x
- 506 26. Richard JP, Melikov K, Vives E, Ramos C, Verbeure B, Gait MJ, et al. Cell-  
507 penetrating peptides: A reevaluation of the mechanism of cellular uptake. *J Biol*  
508 *Chem*. 2003;278: 585–90. doi:10.1074/jbc.M209548200
- 509 27. Siracusano A, Margutti P, Delunardo F, Profumo E, Riganò R, Buttari B, et al.  
510 Molecular cross-talk in host-parasite relationships: the intriguing immunomodulatory  
511 role of *Echinococcus* antigen B in cystic echinococcosis. *Int J Parasitol*. 2008;38:  
512 1371–6. doi:10.1016/j.ijpara.2008.06.003
- 513 28. Siracusano A, Delunardo F, Teggi A, Ortona E. Cystic echinococcosis: aspects of  
514 immune response, immunopathogenesis and immune evasion from the human host.  
515 *Endocrine, Metab Immune Disord Targets*. 2012;12: 16–23.
- 516 29. McMahon HT, Boucrot E. Molecular mechanism and physiological functions of

- 517 clathrin-mediated endocytosis. *Nat Rev Mol Cell Biol.* 2011;12: 517–33.  
518 doi:10.1038/nrm3151
- 519 30. Doherty GJ, McMahon HT. Mechanisms of endocytosis. *Annu Rev Biochem.*  
520 2009;78: 857–902. doi:10.1146/annurev.biochem.78.081307.110540
- 521 31. Lajoie P, Nabi IR. Lipid Rafts, Caveolae, and Their Endocytosis. *International*  
522 *Review of Cell and Molecular Biology.* 1st ed. 2010. pp. 135–163.  
523 doi:10.1016/S1937-6448(10)82003-9
- 524 32. Ewers H, Helenius A. Lipid-mediated endocytosis. *Cold Spring Harb Perspect Biol.*  
525 2011;3: a004721. doi:10.1101/cshperspect.a004721
- 526 33. Kiyonagi T, Iwabuchi K, Shimada K, Hirose K, Miyazaki T, Sumiyoshi K, et al.  
527 Involvement of cholesterol-enriched microdomains in class A scavenger receptor-  
528 mediated responses in human macrophages. *Atherosclerosis.* 2011;215: 60–69.  
529 doi:10.1016/j.atherosclerosis.2010.10.019
- 530 34. Matarazzo S, Quitadamo MC, Mango R, Ciccone S, Novelli G, Biocca S.  
531 Cholesterol-lowering drugs inhibit lectin-like oxidized low-density lipoprotein-1  
532 receptor function by membrane raft disruption. *Mol Pharmacol.* 2012;82: 246–254.  
533 doi:10.1124/mol.112.078915
- 534 35. Yamamoto H, Komekado H, Kikuchi A. Caveolin is necessary for wnt-3a-dependent  
535 internalization of LRP6 and accumulation of  $\beta$ -catenin. *Dev Cell.* 2006;11: 213–223.  
536 doi:10.1016/j.devcel.2006.07.003
- 537 36. Zeng Y, Tao N, Chung KN, Heuser JE, Lublin DM. Endocytosis of oxidized low  
538 density lipoprotein through scavenger receptor CD36 utilizes a lipid raft pathway that  
539 does not require caveolin-1. *J Biol Chem.* 2003;278: 45931–45936.  
540 doi:10.1074/jbc.M307722200
- 541 37. Liu CC, Kanekiyo T, Roth B, Bu G. Tyrosine-based signal mediates LRP6 receptor  
542 endocytosis and desensitization of wnt/ $\beta$ -catenin pathway signaling. *J Biol Chem.*



- 543 2014;289: 27562–27570. doi:10.1074/jbc.M113.533927
- 544 38. Robinson MW, Alvarado R, To J, Hutchinson AT, Dowdell SN, Lund M, et al. A  
545 helminth cathelicidin-like protein suppresses antigen processing and presentation in  
546 macrophages via inhibition of lysosomal vATPase. *FASEB J.* 2012;26: 4614–4627.  
547 doi:10.1096/fj.12-213876
- 548 39. Grant BD, Donaldson JG. Pathways and mechanisms of endocytic recycling. *Nat*  
549 *Rev Mol Cell Biol.* 2009;10: 597–608. doi:10.1038/nrm2755
- 550 40. Bozza G, Capitani M, Montanari P, Benucci B, Biancucci M, Nardi-Dei V, et al. Role  
551 of ARF6, Rab11 and external Hsp90 in the trafficking and recycling of recombinant-  
552 soluble *Neisseria meningitidis* adhesin A (rNadA) in human epithelial cells. *PLoS*  
553 *One.* 2014;9: e110047. doi:10.1371/journal.pone.0110047
- 554 41. Sharma M, Redpath GM, Williams MJ, McCormick SP. Recycling of  
555 apolipoprotein(a) after PlgRKT-mediated endocytosis of lipoprotein(a). *Circ Res.*  
556 2016;120: CIRCRESAHA.116.310272. doi:10.1161/CIRCRESAHA.116.310272
- 557 42. Barrett J, Saghir N, Timanova A, Clarke K, Brophy PM. Characterisation and  
558 properties of an intracellular lipid-binding protein from the tapeworm *Moniezia*  
559 *expansa*. *Eur J Biochem.* 1997;250: 269–275. doi:10.1111/j.1432-  
560 1033.1997.0269a.x
- 561
